# Supplementary material
Source: PubMed Central journal article supplement (PMC3208619)

Figure S1

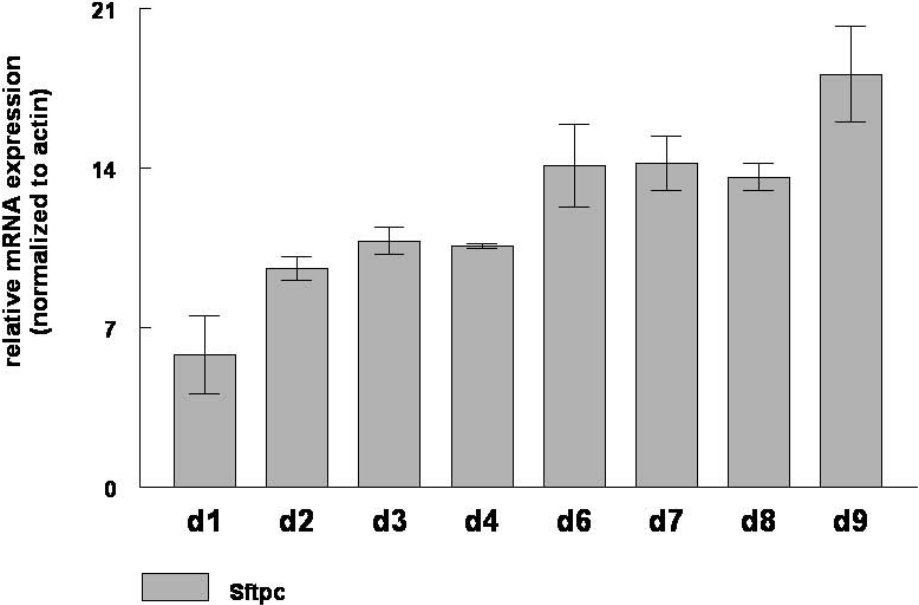

Figure S2

A

EM

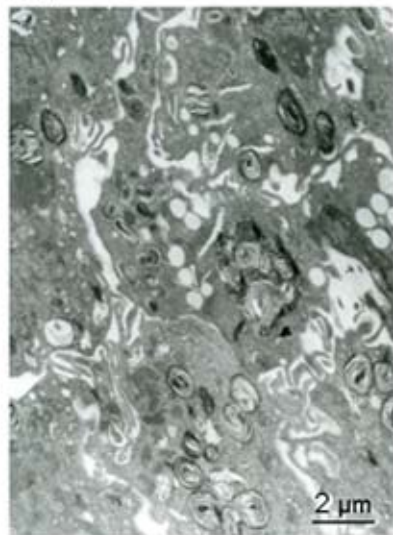

B

TTF-1

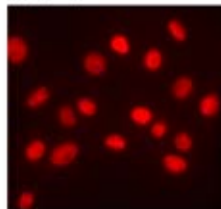

Sftpc

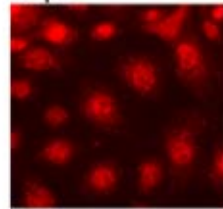

DAPI

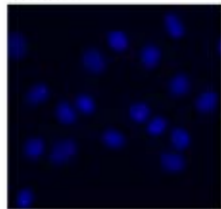

DAPI

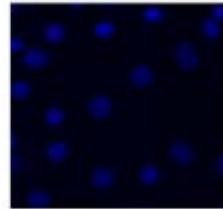

overlay

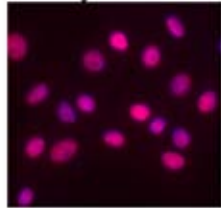

overlay

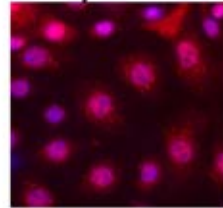

Figure S3

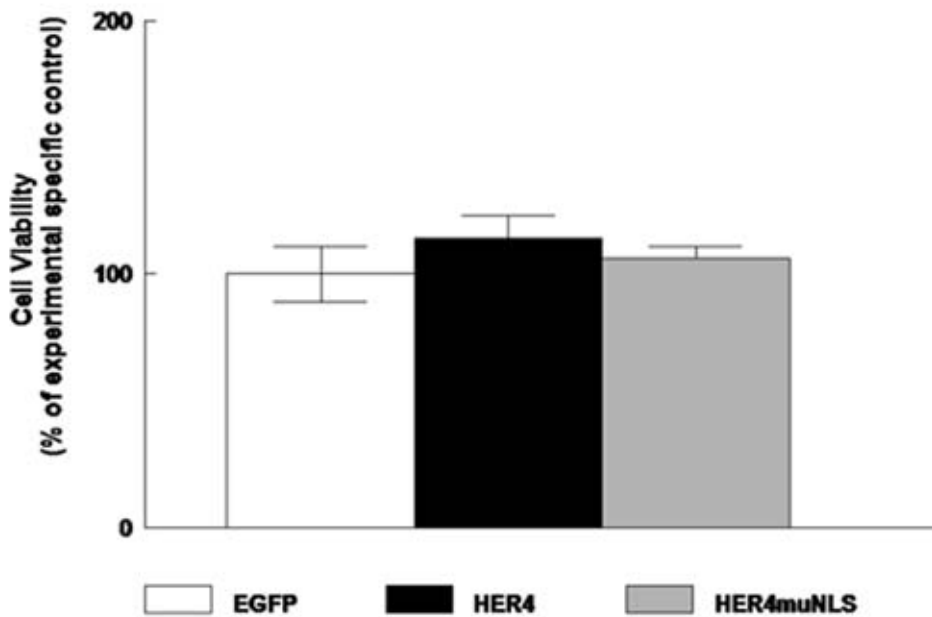

Figure S4

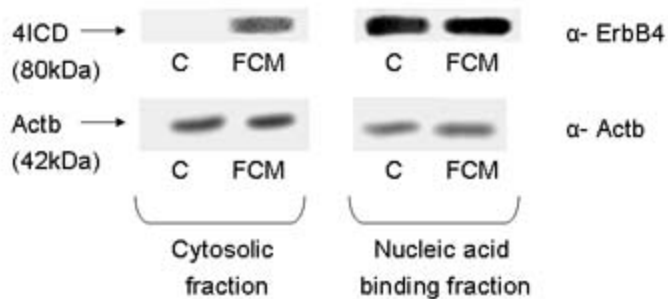

Supplement: supp_45_4_761__2.pdf [file supp_45_4_761__2.pdf]
